1 **An ancient antimicrobial protein co-opted by a fungal plant pathogen for *in***  
2 ***planta* mycobiome manipulation**

3

4 Nick C. Snelders<sup>1,2,3</sup>, Gabriella C. Petti<sup>2</sup>, Grardy C. M. van den Berg<sup>1</sup>, Michael F. Seidl<sup>3</sup>, Bart P.H.J.  
5 Thomma<sup>1,2\*</sup>

6

7 <sup>1</sup>Laboratory of Phytopathology, Wageningen University & Research, Wageningen, The Netherlands

8 <sup>2</sup>Cluster of Excellence on Plant Sciences (CEPLAS), Institute for Plant Sciences, University of Cologne,  
9 Cologne, Germany

10 <sup>3</sup>Theoretical Biology & Bioinformatics Group, Department of Biology, Utrecht University, Utrecht,  
11 The Netherlands

12

13 \*Corresponding author: Institute for Plant Sciences, Cluster of Excellence on Plant Sciences (CEPLAS),  
14 Universität zu Köln, Zùlpicher Straße 47b, D-50674 Cologne, Germany. Tel: +49-221-47089261, e-  
15 mail: bthomma@uni-koeln.de

16 **ABSTRACT**

17 Microbes typically secrete a plethora of molecules to promote niche colonization. Soil-dwelling  
18 microbes are well-known producers of antimicrobials that are exploited to outcompete microbial co-  
19 inhabitants. Also plant pathogenic microbes secrete a diversity of molecules into their environment  
20 for niche establishment. Upon plant colonization, microbial pathogens secrete so-called effector  
21 proteins that promote disease development. While such effectors are typically considered to  
22 exclusively act through direct host manipulation, we recently reported that the soil-borne fungal  
23 xylem-colonizing vascular wilt pathogen *Verticillium dahliae* exploits effector proteins with  
24 antibacterial properties to promote host colonization through the manipulation of beneficial host  
25 microbiota. Since fungal evolution preceded land plant evolution, we now speculate that a subset of  
26 the pathogen effectors involved in host microbiota manipulation evolved from ancient antimicrobial  
27 proteins of terrestrial fungal ancestors that served in microbial competition prior to the evolution of  
28 plant pathogenicity. Here, we show that *V. dahliae* has co-opted an ancient antimicrobial protein as  
29 effector, named VdAMP3, for mycobiome manipulation *in planta*. We show that VdAMP3 is  
30 specifically expressed to ward off fungal niche competitors during resting structure formation in  
31 senescing mesophyll tissues. Our findings indicate that effector-mediated microbiome manipulation  
32 by plant pathogenic microbes extends beyond bacteria and also concerns eukaryotic members of  
33 the plant microbiome. Finally, we demonstrate that fungal pathogens can exploit plant microbiome-  
34 manipulating effectors in a life-stage specific manner, and that a subset of these effectors has  
35 evolved from ancient antimicrobial proteins of fungal ancestors that likely originally functioned in  
36 manipulation of terrestrial biota.

37 **SIGNIFICANCE STATEMENT**

38 Microbes secrete a diversity of molecules into their environment to mediate niche colonization.  
39 During host ingress, plant pathogenic microbes secrete effector proteins that facilitate disease  
40 development, many of which deregulate host immune responses. We recently demonstrated that  
41 plant pathogens additionally exploit effectors with antibacterial activities to manipulate beneficial  
42 plant microbiota to promote host colonization. Here, we show that the fungal pathogen *Verticillium*  
43 *dahliae* has co-opted an ancient antimicrobial protein, that likely served in microbial competition in  
44 terrestrial environments before land plants existed, as effector for the manipulation of fungal  
45 competitors during host colonization. Thus, we demonstrate that pathogen effector repertoires  
46 comprise antifungal proteins, and speculate such effectors could be exploited for the development  
47 of novel antimycotics.

## 48 INTRODUCTION

49 Microbes are found in a wide diversity of niches on our planet. To facilitate establishment within  
50 microbial communities, microbes secrete a multitude of molecules to manipulate each other. Many  
51 of these molecules exert antimicrobial activities and are exploited to directly suppress microbial co-  
52 inhabitants in order to outcompete them for the limitedly available nutrients and space of a niche.  
53 Microbially-secreted antimicrobials encompass diverse molecules including peptides (AMPs) and  
54 lytic enzymes, but also non-proteinaceous molecules such as secondary metabolites. Soils are  
55 among the most biologically diverse and microbially competitive environments on earth. Microbial  
56 proliferation in the soil environment is generally limited by the availability of organic carbon (1), for  
57 which soil microbes continuously compete. Consequently, numerous saprophytic soil-dwelling  
58 microbes secrete potent antimicrobials that promote niche protection or colonization. Notably,  
59 these microbes are the primary source of our clinically used antibiotics (2, 3).

60 Like free-living microbes, also microbial plant pathogens secrete a multitude of molecules  
61 into their environment to mediate niche colonization (4, 5). The study of molecules secreted by  
62 microbial plant pathogens has been largely confined to the context of binary interactions between  
63 pathogens and hosts. To establish disease, plant pathogenic microbes secrete a plethora of so-called  
64 effectors, molecules of various kinds that promote host colonization and that are typically thought  
65 to mainly deregulate host immune responses (4, 6, 7). Upon host colonization, plant pathogens  
66 encounter a plethora of plant-associated microbes that collectively form the plant microbiota, which  
67 represents a key factor for plant health. Beneficial plant-associated microbes are found in and on all  
68 organs of the plant and help to mitigate (a)biotic stresses (8–13). Plants shape their microbiota and  
69 specifically attract beneficial microbes to suppress pathogens (14–16). Hence, the plant microbiome  
70 can be considered an inherent, exogenous layer that complements the plant's endogenous innate  
71 immune system. We previously hypothesized that plant pathogens not only utilize effectors to target  
72 components of host immunity as well as other aspects of host physiology to support host  
73 colonization, but also to target the host microbiota in order to establish niche colonization (4, 5). We

74 recently provided experimental evidence for this hypothesis by showing that the ubiquitously  
75 expressed effector VdAve1 that is secreted by the soil-borne fungal plant pathogen *Verticillium*  
76 *dahliae* acts as a bactericidal protein that promotes host colonization through the selective  
77 manipulation of host microbiomes by suppressing microbial antagonists (17, 18). Additionally, we  
78 demonstrated that VdAve1 and a further antibacterial effector named VdAMP2 are exploited by *V.*  
79 *dahliae* for microbial competition in soil and promote virulence of *V. dahliae* in an indirect manner  
80 (18). Collectively, these observations demonstrate that *V. dahliae* dedicates part of its effector  
81 catalog towards microbiota manipulation. Likely, the *V. dahliae* genome encodes further effectors  
82 that act in microbiome manipulation.

83 Evidently, bacterial and fungal evolution on land preceded land plant evolution. As a  
84 consequence, fungal pathogen effectors involved in the manipulation of (host-associated) microbial  
85 communities may have evolved from ancestors that served in microbial competition in terrestrial  
86 niches hundreds of millions of years ago prior to land plant evolution. However, evidence for this  
87 hypothesis is presently lacking.

88 *V. dahliae* is an asexual xylem-dwelling fungus that causes vascular wilt disease on hundreds  
89 of plant species (19). The fungus survives in the soil in the form of multicellular melanized resting  
90 structures, called microsclerotia, that offer protection against (a)biotic stresses and can persist in the  
91 soil for many years (20). Microsclerotia represent the major inoculum source of *V. dahliae* in nature  
92 and their germination is triggered by carbon- and nitrogen-rich exudates from plant roots (21).  
93 Following microsclerotia germination, fungal hyphae grow through the soil and rhizosphere towards  
94 the roots of host plants. Next, *V. dahliae* colonizes the root cortex and crosses the endodermis, from  
95 which it invades xylem vessels. Once the fungus enters those vessels it forms conidiospores that are  
96 transported with the water flow until they get trapped, for instance by vessel end walls. This triggers  
97 germination of the conidiospores, followed by penetration of cell walls, hyphal growth and renewed  
98 sporulation, leading to systematic colonization of the plant (22). Once tissue necrosis commences  
99 and plant senescence occurs, host immune responses fade and *V. dahliae* enters a saprophytic phase

100 when it emerges from the xylem vessels to invade adjacent host tissues, which is accompanied by  
101 the production of microsclerotia. Upon littering and decomposition of plant tissues, these  
102 microsclerotia are released into the soil (23).

103

## 104 RESULTS

105 To identify effectors potentially acting in microbiome manipulation, we recently queried the *V.*  
106 *dahliae* secretome for structural homologs of known antimicrobial proteins (AMPs), which led to the  
107 identification of ten candidates, including the functionally characterized VdAMP2 (18). Among the  
108 remaining nine candidates we now identified a small cysteine-rich protein of ~4.9 kDa, which we  
109 name VdAMP3. As a first step in the characterization of VdAMP3 we assessed its predicted structure.  
110 Interestingly, VdAMP3 is predicted to adopt a Cysteine-stabilized  $\alpha\beta$  (CS $\alpha\beta$ ) fold that is also found in  
111 defensin-like proteins (Fig. 1a)(24–26). CS $\alpha\beta$  defensins represent a wide-spread and well-  
112 characterized family of antimicrobial proteins that are presumed to share a single ancient origin in  
113 the last common ancestor of animals, plants and fungi that produce these proteins today (24–27). It  
114 is important to note, however, that many typical small cysteine-rich pathogen effectors adopt AMP-  
115 like conformations, and that tertiary structures of several AMP families strongly resemble each other  
116 (27, 28). Hence, structure prediction can easily lead to false-positive classifications as AMP or  
117 allocation to the wrong AMP family.

118 CS $\alpha\beta$  defensins, or so-called *cis*-defensins, owe their structure to highly conserved *cis*-  
119 orientated disulfide bonds that establish an interaction between a double- or triple-stranded  
120 antiparallel  $\beta$ -sheet with an  $\alpha$ -helix (25, 27). To validate the prediction of VdAMP3 as a member of  
121 this ancient antimicrobial protein family, we aligned its amino acid sequence with the antibacterial  
122 CS $\alpha\beta$  defensins Plectasin and Eurocin, from the saprophytic Ascomycete species *Pseudoplectania*  
123 *nigrella* and *Eurotium amstelodami* (formerly *Aspergillus amstelodami*), respectively (29–31).  
124 Although the biological relevance of these defensins for the respective fungi remains unclear, their  
125 antibacterial activity and protein structure have been well characterized, which lead to their

126 recognition as genuine CS $\alpha$  $\beta$  defensins (29–31). Although the overall identity between the three  
127 proteins was rather low (25-40%), protein sequence alignment revealed that VdAMP3 contains the  
128 six highly conserved cysteine residues that are considered crucial for the structure of CS $\alpha$  $\beta$  defensins  
129 (Fig. 1b)(27). To further substantiate the emerging picture that VdAMP3 belongs to this particular  
130 protein family, and that the detected similarities with Plectasin and Eurocin are not the result of  
131 convergent protein evolution, we queried the predicted proteomes of the fungi from the JGI 1000  
132 Fungal Genomes Project (32) for homologs of VdAMP3 with higher sequence identity and included a  
133 subset of those in the protein alignment (Fig. 1c). Interestingly, besides homologs in Ascomycota and  
134 Basidiomycota, our sequence similarity search also revealed homologs in early-diverging fungi from  
135 the subphyla Mucoromycotina and Zoopagomycota (both formerly classified as Zygomycota (33))  
136 (Fig. 1c). Importantly, this divergence is estimated to have taken place approximately 900 million  
137 years ago (34), indicating it preceded the evolution of the first land plants approximately 450 million  
138 years later (34–37). Consequently, this analysis indicates that *VdAMP3* evolved from an ancestral  
139 fungal gene hundreds of millions of years ago, before land plants existed.

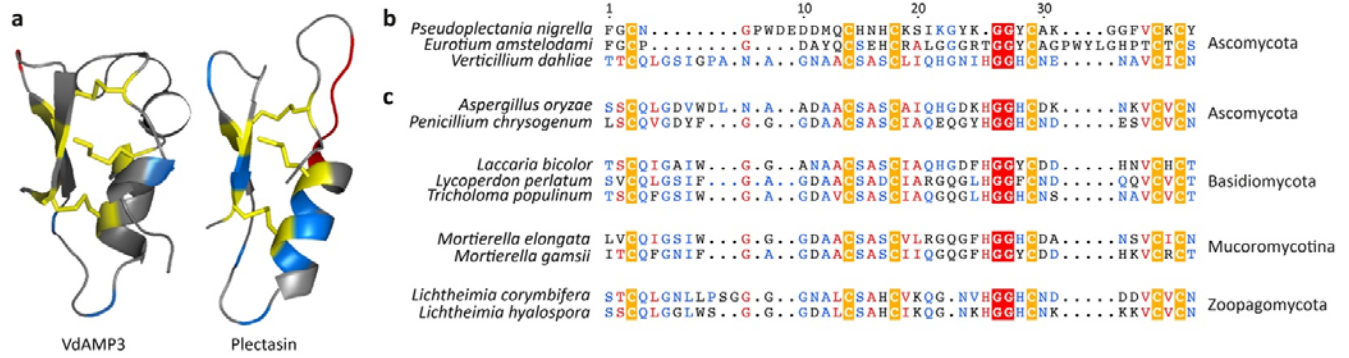

140

141 **Figure 1. The *V. dahliae* effector VdAMP3 evolved from an ancient fungal protein.** (a) VdAMP3  
 142 (left) is predicted to adopt a cysteine-stabilized  $\alpha\beta$  (CS $\alpha\beta$ ) defensin-like fold. The structure of the  
 143 CS $\alpha\beta$  defensin Plectasin (right) of the fungus *Pseudoplectania nigrella* is included as reference. The  
 144 disulfide bonds stabilizing the antiparallel  $\beta$ -sheets and the  $\alpha$ -helix are highlighted in yellow.  
 145 Positively and negatively charged amino acid residues are highlighted in blue and red, respectively.  
 146 (b) Protein sequence alignment with CS $\alpha\beta$  defensins Plectasin and Eurocin (*Eurotium amstelodami*)  
 147 supports the structure prediction of VdAMP3. (c) VdAMP3 homologs are widespread in the fungal  
 148 kingdom. Protein sequence alignment of VdAMP3 with a subset of its homologs identified in higher  
 149 (Ascomycota and Basidiomycota) and lower fungi (Mucoromycotina and Zoopagomycota). The  
 150 alignment as shown in (b-c) displays the most conserved region of the CS $\alpha\beta$  defensin protein family  
 151 and was performed using HMMER and visualized with Esript3. The highly conserved cysteine and  
 152 glycine residues that contribute to the CS $\alpha\beta$  defensin structure are highlighted by yellow and red  
 153 backgrounds, respectively. The homologs displayed in (c) were identified using blastP in the  
 154 predicted proteomes of the respective fungi included in the JGI 1000 Fungal Genomes Project (32).

155

156 As a first step to determine the role of VdAMP3 in *V. dahliae* infection biology, we assessed  
 157 conditions for VdAMP3 expression. Transcriptome analysis of diverse *V. dahliae* strains during  
 158 colonization of a diversity of hosts did not reveal *in planta* expression of VdAMP3 thus far (17, 38–  
 159 40). However, strong induction of this effector gene was reported during microsclerotia formation in  
 160 a transcriptome analysis of *V. dahliae* strain XS11 grown *in vitro* (24). To validate this finding, we  
 161 analyzed *in vitro* expression of VdAMP3 in *V. dahliae* strain JR2. To this end, *V. dahliae* conidiospores  
 162 were spread on nitrocellulose membranes placed on top of solid minimal medium and fungal  
 163 material was harvested prior to microsclerotia formation, after 48 hours of incubation, and after the  
 164 onset of microsclerotia formation, after 96 hours of incubation. Expression of VdAMP3 was  
 165 determined at both time points with real-time PCR alongside expression of the *Chr6g02430* gene  
 166 that encodes a putative cytochrome P450 enzyme that acts as a marker for microsclerotia formation



167 (24, 41). Consistent with the observations for *V. dahliae* strain XS11 (24), no *VdAMP3* expression was  
168 detected at 48 hours when also *Chr6g02430* was not expressed and no visual microsclerotia  
169 formation could be observed on the growth medium (Fig. 2a). However, induction of *VdAMP3* as  
170 well as *Chr6g02430* was observed after 96 hours of incubation, at which time point also the  
171 formation of microsclerotia on the growth medium became apparent (Fig. 2a). Collectively these  
172 data demonstrate that expression of *VdAMP3* coincides with microsclerotia formation *in vitro* also  
173 for *V. dahliae* strain JR2.

174         Although previous transcriptome analyses failed to detect *in planta* expression of *VdAMP3*,  
175 we realized that these analyses were predominantly performed for infection stages when the fungus  
176 is still confined to the xylem vessels and microsclerotia formation had not yet been initiated.  
177 Accordingly, *in planta* expression of *VdAMP3* may have been missed. Thus, we inoculated *Nicotiana*  
178 *benthamiana* with *V. dahliae* and determined expression of *VdAMP3* in leaves and petioles sampled  
179 at different time points and displaying different disease phenotypes, ranging from asymptomatic at  
180 seven days post inoculation (dpi) to complete necrosis at 22 dpi. As expected, a strong induction of  
181 the previously characterized *VdAve1* effector gene was detected at seven and 14 dpi (Fig. 2b) (17,  
182 18). In contrast, however, no expression of *VdAMP3* was recorded, even at the latest time point  
183 when the leaf tissue had become completely necrotic (Fig. 2b). Importantly, also no *Chr6g02430*  
184 expression was detected at any of these time points (Fig. 2b), suggesting that microsclerotia  
185 formation had not yet started in these tissues. Indeed, visual inspection of the necrotic plant tissue  
186 collected at 22 dpi did not reveal microsclerotia presence. To induce microsclerotia formation, *V.*  
187 *dahliae*-inoculated *N. benthamiana* plants harvested at 22 dpi were sealed in plastic bags and  
188 incubated in the dark to increase the relative humidity and mimic conditions that occur during tissue  
189 decomposition in the soil. Interestingly, after eight days of incubation the first microsclerotia could  
190 be observed, and induction of *VdAMP3* as well as *Chr6g02430* was detected (Fig. 2c). Collectively,  
191 these findings suggest that *in planta* expression of *VdAMP3* coincides with microsclerotia formation,

192 similar to our observations *in vitro*. Moreover, our data suggest that *VdAMP3* expression primarily  
 193 depends on a developmental stage of *V. dahliae* rather than on host factors such as tissue necrosis.

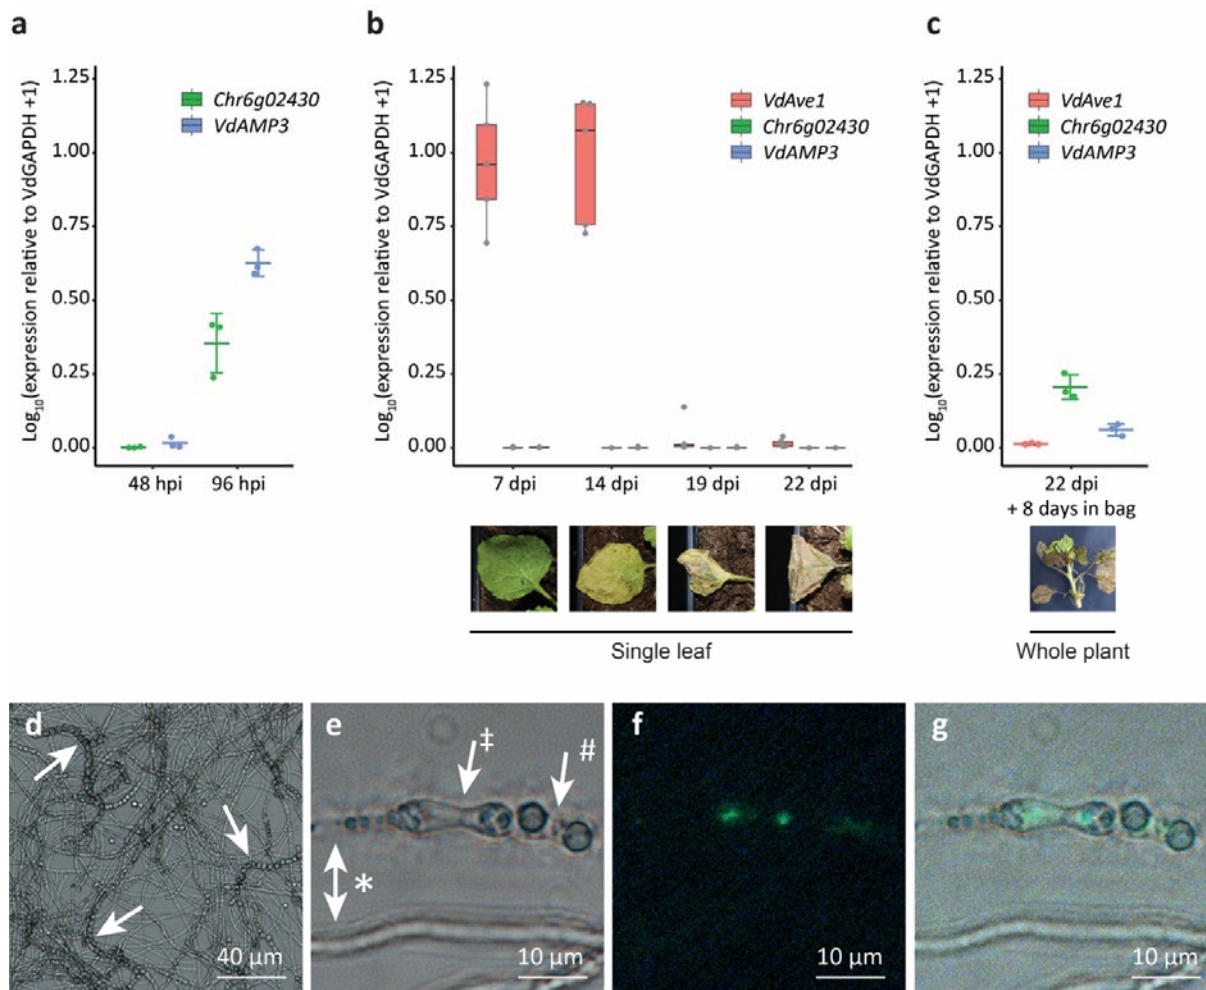

194  
 195 **Figure 2. *VdAMP3* is specifically expressed in hyphal cells that develop into microsclerotia.** (a)  
 196 Expression of *VdAMP3* and the marker gene for microsclerotia development *Chr6g02430*, relative to  
 197 the household gene *VdGAPDH* at 48 and 96 hours of *in vitro* cultivation (N=3). (b) Expression of  
 198 *VdAve1*, *VdAMP3* and *Chr6g02430* in *N. benthamiana* leaves from 7 to 22 days post inoculation (dpi)  
 199 (N=5). (c) Expression of *VdAve1*, *VdAMP3* and *Chr6g02430* in tissue of *N. benthamiana* plants  
 200 harvested at 22 days post inoculation after 8 days of incubation in sealed plastic bags (N=3). (d)  
 201 Microsclerotia formation of a *pVdAMP3::eGFP* reporter mutant as detected after 7 days of  
 202 cultivation in Czapek Dox medium. Typical chains of microsclerotia (42, 43) are indicated by arrows.  
 203 (e) Bright field image of various *V. dahliae* cell types after 7 days of cultivation in Czapek Dox,  
 204 including hyphae (\*), swollen hyphal cells developing into microsclerotia (‡) and mature  
 205 microsclerotia cells (#). (f) GFP signal for the image as shown in (e), indicative for activity of the  
 206 *VdAMP3* promoter, is exclusively detected in the swollen hyphal cells developing into microsclerotia.  
 207 (g) Overlay of (e) and (f).

208 To determine more precisely where VdAMP3 is expressed, and to improve our understanding of how  
209 *V. dahliae* may benefit from effector expression during microsclerotia formation, we generated a *V.*  
210 *dahliae* reporter strain expressing eGFP under control of the *VdAMP3* promoter. Intriguingly,  
211 microscopic analysis of the reporter strain during microsclerotia formation stages *in vitro* (Fig. 2d),  
212 revealed that *VdAMP3* is expressed by swollen hyphal cells that act as primordia that subsequently  
213 develop into microsclerotia, but not by the adjacent hyphal cells or recently developed  
214 microsclerotia cells (Fig. 2e-g). This highly specific expression of VdAMP3 suggests that the effector  
215 protein may facilitate the formation of microsclerotia in decaying host tissue. Given its presumed  
216 antimicrobial activity, VdAMP3 may be involved in antagonistic activity against opportunistic decay  
217 organisms in this microbially competitive niche.

218 To determine if VdAMP3 indeed exerts antimicrobial activity, we incubated a randomly  
219 selected panel of bacterial isolates with the effector protein and monitored their growth *in vitro*.  
220 VdAMP3 concentrations as high as 20  $\mu$ M resulted in no or only marginal bacterial growth inhibition  
221 (Supplementary Fig. 1). A similar assay with fungal isolates showed that incubation with 5  $\mu$ M of  
222 VdAMP3 already markedly affected growth of the filamentous fungi *Alternaria brassicicola* and  
223 *Cladosporium cucumerinum* and the yeasts *Pichia pastoris* and *Saccharomyces cerevisiae* (Figure 3a).  
224 This finding suggests that VdAMP3 displays more potent activity against fungi than against bacteria.

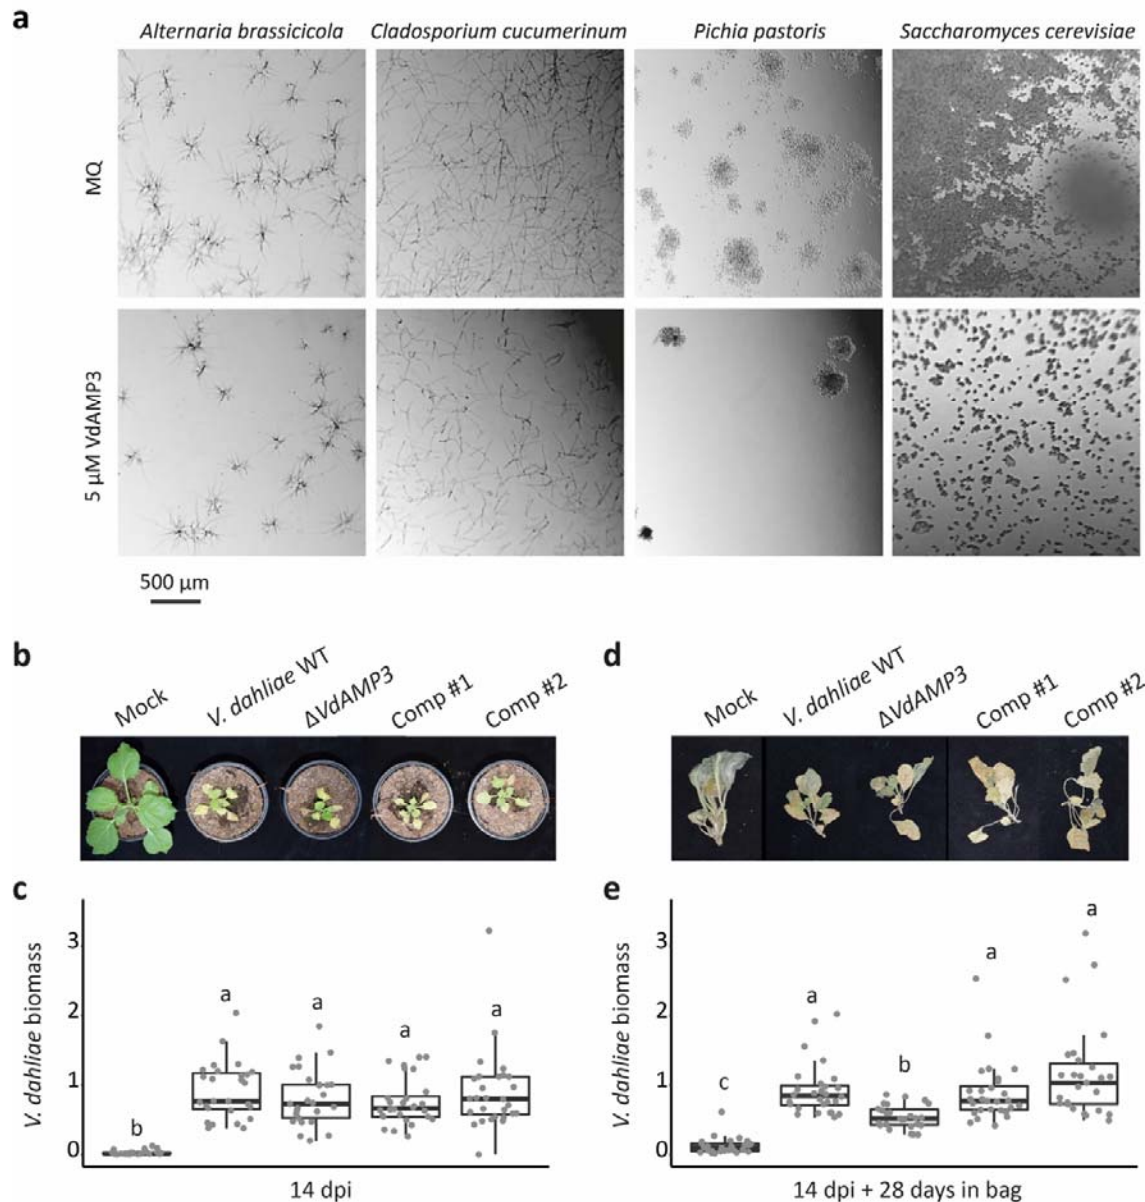

225 **Figure 3. VdAMP3 is an antifungal protein that contributes to *V. dahliae* biomass accumulation in**  
 226 **the decaying host phyllosphere. (a)** Microscopic pictures of fungal isolates grown in 0.05x potato  
 227 dextrose broth supplemented with 5  $\mu$ M VdAMP3 or ultrapure water (MQ). VdAMP3 impairs growth  
 228 of *Alternaria brassicicola*, *Cladosporium cucumerinum*, *Pichia pastoris* and *Saccharomyces cerevisiae*.  
 229 Pictures were taken after 24 (*A. brassicicola*, *C. cucumerinum* and *S. cerevisiae*) or 64 (*P. pastoris*)  
 230 hours of incubation. **(b)** VdAMP3 does not contribute to establishment of Verticillium wilt disease in  
 231 *N. benthamiana*. Photos display representative phenotypes of *N. benthamiana* plants infected by  
 232 wild-type *V. dahliae* (WT), the VdAMP3 deletion ( $\Delta$ VdAMP3) and two complementation (Comp)  
 233 mutants 14 days post inoculation. **(c)** Relative *V. dahliae* biomass in above-ground *N. benthamiana*  
 234 tissues determined with real-time PCR. Different letter labels represent significant differences (one-  
 235 way ANOVA and Tukey's post-hoc test;  $p < 0.05$ ;  $N \geq 27$ ) **(d)** Representative phenotypes of *N.*  
 236 *benthamiana* plants as shown in **(b)** after 28 days of incubation in plastic bags. **(e)** Relative *V. dahliae*  
 237 biomass in *N. benthamiana* tissues as displayed in **(d)**. Letters represent significant differences (one-  
 238 way ANOVA and Tukey's post-hoc test;  $p < 0.05$ ;  $N \geq 27$ ).

239 To study the importance of the antifungal activity of VdAMP3 during and after host  
240 colonization, a *VdAMP3* deletion mutant was generated as well as complementation strains  
241 (Supplementary Fig 2). Importantly, targeted deletion of *VdAMP3* did not affect growth nor  
242 microsclerotia formation *in vitro* (Supplementary Fig. 3a,b). To determine if VdAMP3 contributes to  
243 Verticillium wilt disease development, *N. benthamiana* plants were inoculated with wild-type *V.*  
244 *dahliae* and the *VdAMP3* deletion mutant. In line with our inability to detect expression during early  
245 infection stages, disease phenotypes and *V. dahliae* biomass quantification using real-time PCR did  
246 not reveal a contribution of VdAMP3 to host colonization up to two weeks after inoculation (Fig.  
247 3b,c). To test if VdAMP3 contributes to *V. dahliae* niche establishment following systemic host  
248 colonization, we harvested the *N. benthamiana* plants and sealed them in plastic bags to induce  
249 microsclerotia formation. Interestingly, following four weeks of incubation, *V. dahliae* biomass  
250 quantification in *N. benthamiana* plants inoculated with the various genotypes using real-time PCR  
251 revealed a significant reduction in biomass of the *VdAMP3* deletion mutant when compared with  
252 wild-type *V. dahliae* and complementation mutants (Fig 3d,e).

253 To investigate if the effects of VdAMP3 are limited to *N. benthamiana*, or whether those also  
254 extend to other hosts, we inoculated *Arabidopsis thaliana* plants with wild-type *V. dahliae* and the  
255 *VdAMP3* deletion mutant. Consistent with our observations for *N. benthamiana*, deletion of  
256 *VdAMP3* did not affect establishment of Verticillium wilt in *A. thaliana* (Supplementary Fig. 4a,b).  
257 However, *V. dahliae* biomass quantification in above-ground *A. thaliana* tissues at three weeks post  
258 inoculation revealed reduced accumulation of *V. dahliae* in the absence of VdAMP3 (Supplementary  
259 Fig. 4c). Thus, the effects of VdAMP3 are not restricted to a single host.

260 As *in vitro* antimicrobial activity assays pointed towards fungi as the primary targets of  
261 VdAMP3, we speculated that *V. dahliae* exploits VdAMP3 to suppress fungal competitors in  
262 decomposing host tissues to safeguard the formation of its resisting structures. To characterize the  
263 microbiota associated with *N. benthamiana* decomposition and to determine the impact of VdAMP3  
264 on these microbial communities, we characterized the phyllosphere microbiota of fresh mock-

265 inoculated *N. benthamiana* plants, and decaying plants diseased by *V. dahliae* WT or the *VdAMP3*  
266 deletion mutant incubated in plastic bags, through shotgun metagenomic sequencing. Consistent  
267 with a primary role for fungi in the decomposition of dead plant material (44–48) we detected a  
268 significant increase of fungi and decrease of bacteria in the phyllosphere of the *N. benthamiana*  
269 plants diseased by the *V. dahliae* strains when compared with healthy mock-treated plants (Fig. 4a-  
270 b). These changes are accompanied by a reduced alpha diversity in the decaying phyllospheres (Fig.  
271 4c). Additionally, principal coordinate analysis (PCoA) based on Bray-Curtis dissimilarities (beta  
272 diversity) uncovered clear separation of the microbiota of the healthy plants from those in decay  
273 (Fig. 4d). The PCoA also revealed a weaker, yet potentially relevant, separation of the microbiota  
274 colonized by *V. dahliae* WT and the *VdAMP3* deletion mutant, which suggests that secretion of  
275 *VdAMP3* manipulates microbiome compositions (Fig. 4d). Intriguingly, when we compared the  
276 abundances of the identified microbial genera between the microbiomes colonized by *V. dahliae* WT  
277 and the *VdAMP3* deletion mutant, we detected significantly more differentially abundant fungi  
278 (10.1%) than bacteria (3.8%) (Fig. 4e) (Supplementary Table 1-2). Interestingly, whereas the number  
279 of bacterial genera that display an increased or a decreased abundance in the presence of *VdAMP3*  
280 is more or less equal, the vast majority of the differentially abundant fungal genera (82.1%) are  
281 repressed in the presence of *VdAMP3* (Fig. 4f). Moreover, while no consistent suppression of  
282 bacterial genera from the same class could be detected, we exclusively identified suppression of the  
283 differentially abundant fungal genera from the Saccharomycetes or Sordariomycetes in the presence  
284 of *VdAMP3* (Fig. 4g-h). Thus, these observations indicate that *V. dahliae* *VdAMP3* mainly acts as an  
285 antifungal effector protein that displays selective activity that predominantly impacts the  
286 mycobiome in the decaying host phyllosphere.

287

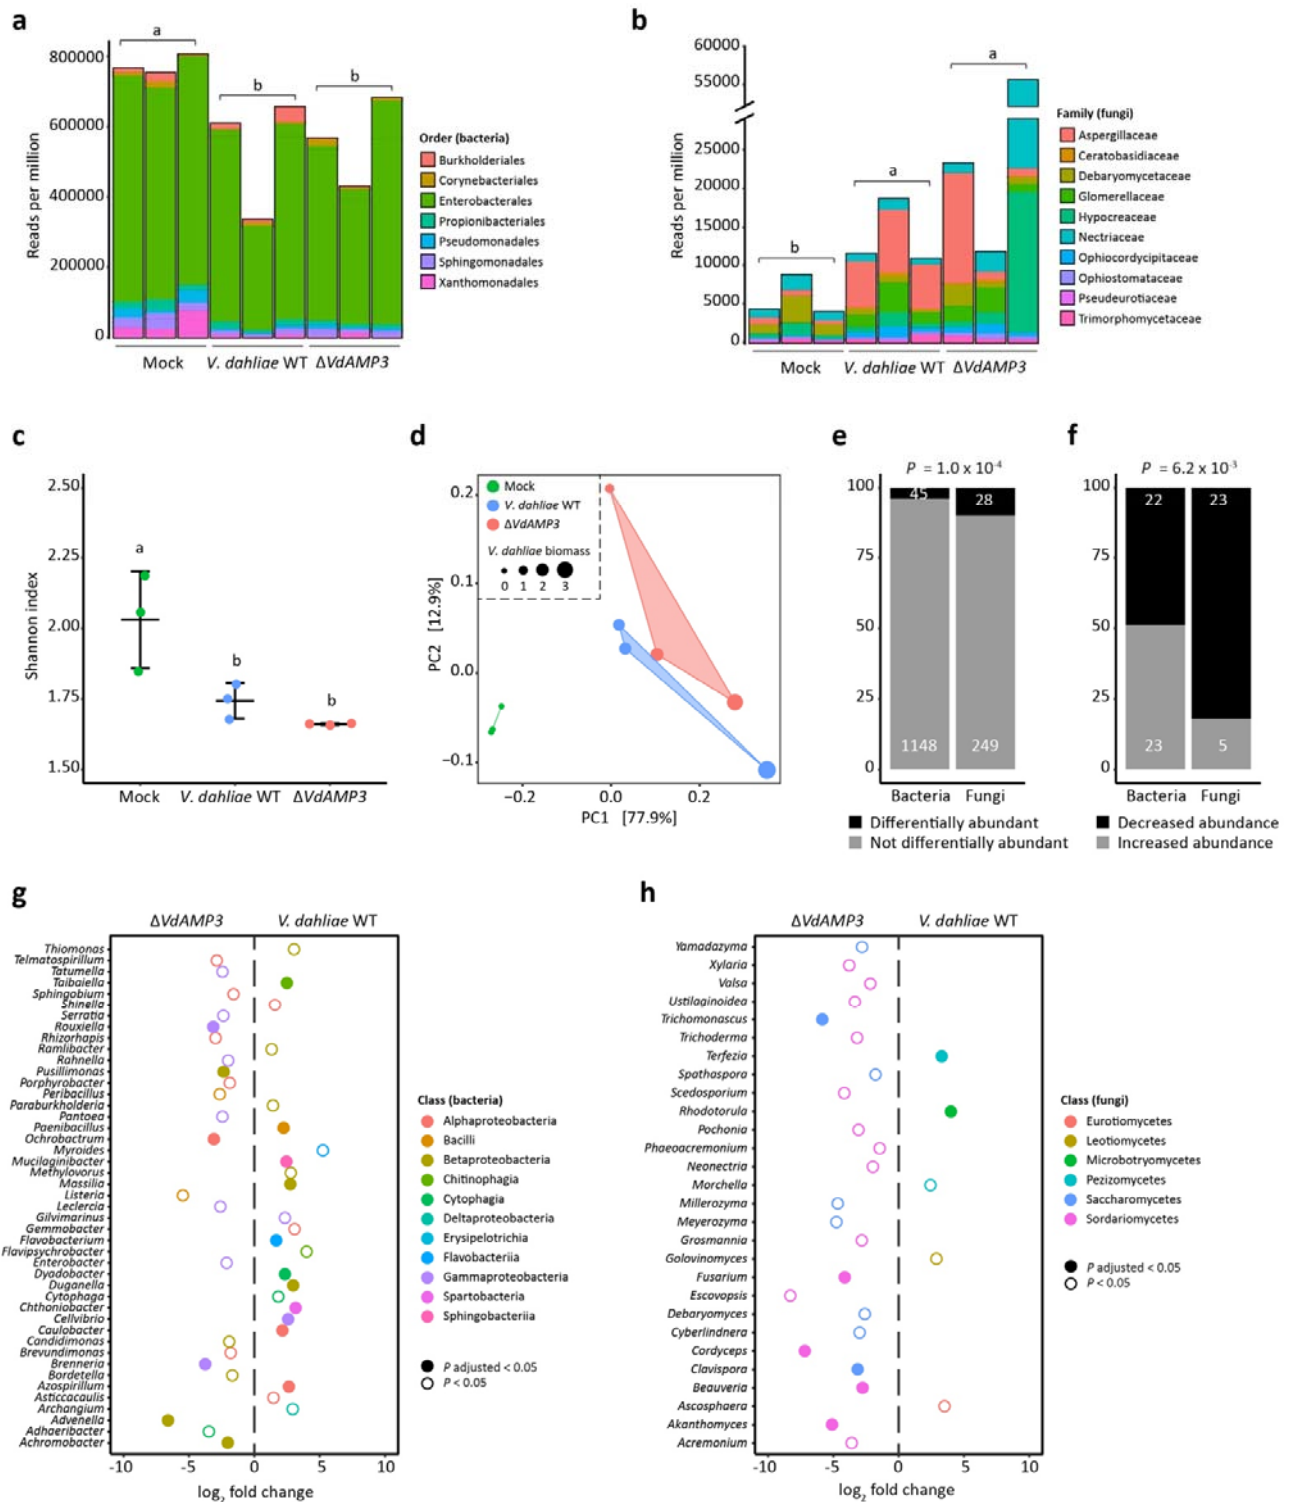

288

289 **Figure 4. VdAMP3 manipulates the mycobiome of the decaying *N. benthamiana* phyllosphere. (a-**  
 290 **b) *V. dahliae*-induced decay of the *N. benthamiana* phyllosphere is associated with a decreased**  
 291 **bacterial, and increased fungal, abundance. Relative abundance of bacteria (a) and fungi (b),**  
 292 **excluding *V. dahliae*, in the phyllosphere of decaying *N. benthamiana* plants colonized by wild-type**



293 *V. dahliae* or the *VdAMP3* deletion mutant (14 days post inoculation and after 28 days of incubation  
294 in plastic bags), and in the phyllosphere of fresh *N. benthamiana* plants (mock). Letters represent  
295 significant differences in total bacterial/fungal abundance between the three treatments (one-way  
296 ANOVA and Tukey's post hoc test;  $P \leq 0.05$ ;  $N=3$ ). **(c)** *V. dahliae*-induced decay of *N. benthamiana*  
297 plants impacts alpha diversity of the phyllosphere. The plot displays the average Shannon index  $\pm$   
298 SD, letters represent significant differences (one-way ANOVA and Tukey's post hoc test;  $P \leq 0.05$ ;  
299  $N=3$ ). **(d)** Principal coordinate analysis based on Bray-Curtis dissimilarities (beta diversity) reveals  
300 separation of the microbiomes based on the three different treatments. **(e)** Differential abundance  
301 analysis of microbial genera between the microbiomes colonized by *V. dahliae* WT and the *VdAMP3*  
302 deletion mutant indicates that secretion of *VdAMP3* significantly impacts a larger proportion of the  
303 fungi than of the bacteria (two-tailed Fisher's exact test). **(f)** Of the differentially abundant microbial  
304 genera, significantly more fungi display a decreased abundance in the presence of *VdAMP3* when  
305 compared with the bacteria (two-tailed Fisher's exact test). **(g-h)** Overview of the differentially  
306 abundant bacterial **(g)** and fungal **(h)** genera. The plots display increased (positive  $\log_2$  fold change)  
307 or decreased (negative  $\log_2$  fold change) abundance in the presence of *V. dahliae* WT when  
308 compared with the *VdAMP3* deletion mutant (Wald test,  $P$  adjusted  $< 0.05$  and  $P < 0.05$ ,  $N=3$ ).  
309 Differentially abundant fungal genera from the Saccharomycetes or Sordariomycetes are  
310 consistently suppressed in the presence of *VdAMP3*.

311

312 To further substantiate that the suppression of the Saccharomycetes and Sordariomycetes is a direct  
313 consequence of the *VdAMP3* activity, we incubated fungal species belonging to the suppressed  
314 genera with the effector to determine their sensitivity. In line with the previously observed  
315 sensitivity of the Saccharomycetes *P. pastoris* and *S. cerevisiae*, also the Saccharomycete species  
316 *Cyberlindnera jadinii*, *Debaryomyces vanriijiae*, *Rhodotorula bogoriensis* and *Meyerozyma amylolytica*  
317 displayed markedly reduced growth in the presence of *VdAMP3* (Fig. 5a, Supplementary Fig. 5).  
318 Similarly, growth of the Sordariomycetes *Cordyceps militaris* and *Trichoderma viride* was inhibited by  
319 the effector (Supplementary Fig. 5). Hence, these findings support the observed suppression of the  
320 Saccharomycetes and Sordariomycetes in the *N. benthamiana* phyllosphere mycobiome as a direct  
321 consequence of *VdAMP3* activity.

322 The cell type-specific expression of *VdAMP3*, combined with its role in mycobiome  
323 manipulation, strongly suggests that *VdAMP3* is exploited to ward off fungal niche competitors *in*  
324 *planta* to safeguard the formation of *V. dahliae* microsclerotia. To test if *VdAMP3* indeed is essential  
325 for *V. dahliae* microsclerotia formation in the presence of other fungi, we co-cultivated *V. dahliae*  
326 WT and the *VdAMP3* deletion mutant with *D. vanriijiae* and *M. amylolytica*. Once microsclerotia



327 formation by *V. dahliae* WT became apparent (Fig. 5b), we quantified the number of resting  
 328 structures that were formed when compared with the *VdAMP3* deletion mutant. As anticipated, we  
 329 detected a significant reduction of microsclerotia formed by the *VdAMP3* deletion mutant in the  
 330 presence of both fungal species, confirming that *V. dahliae* relies on the antifungal activity of  
 331 *VdAMP3* to form microsclerotia in the presence of particular fungal niche competitors (Fig. 5c,d).

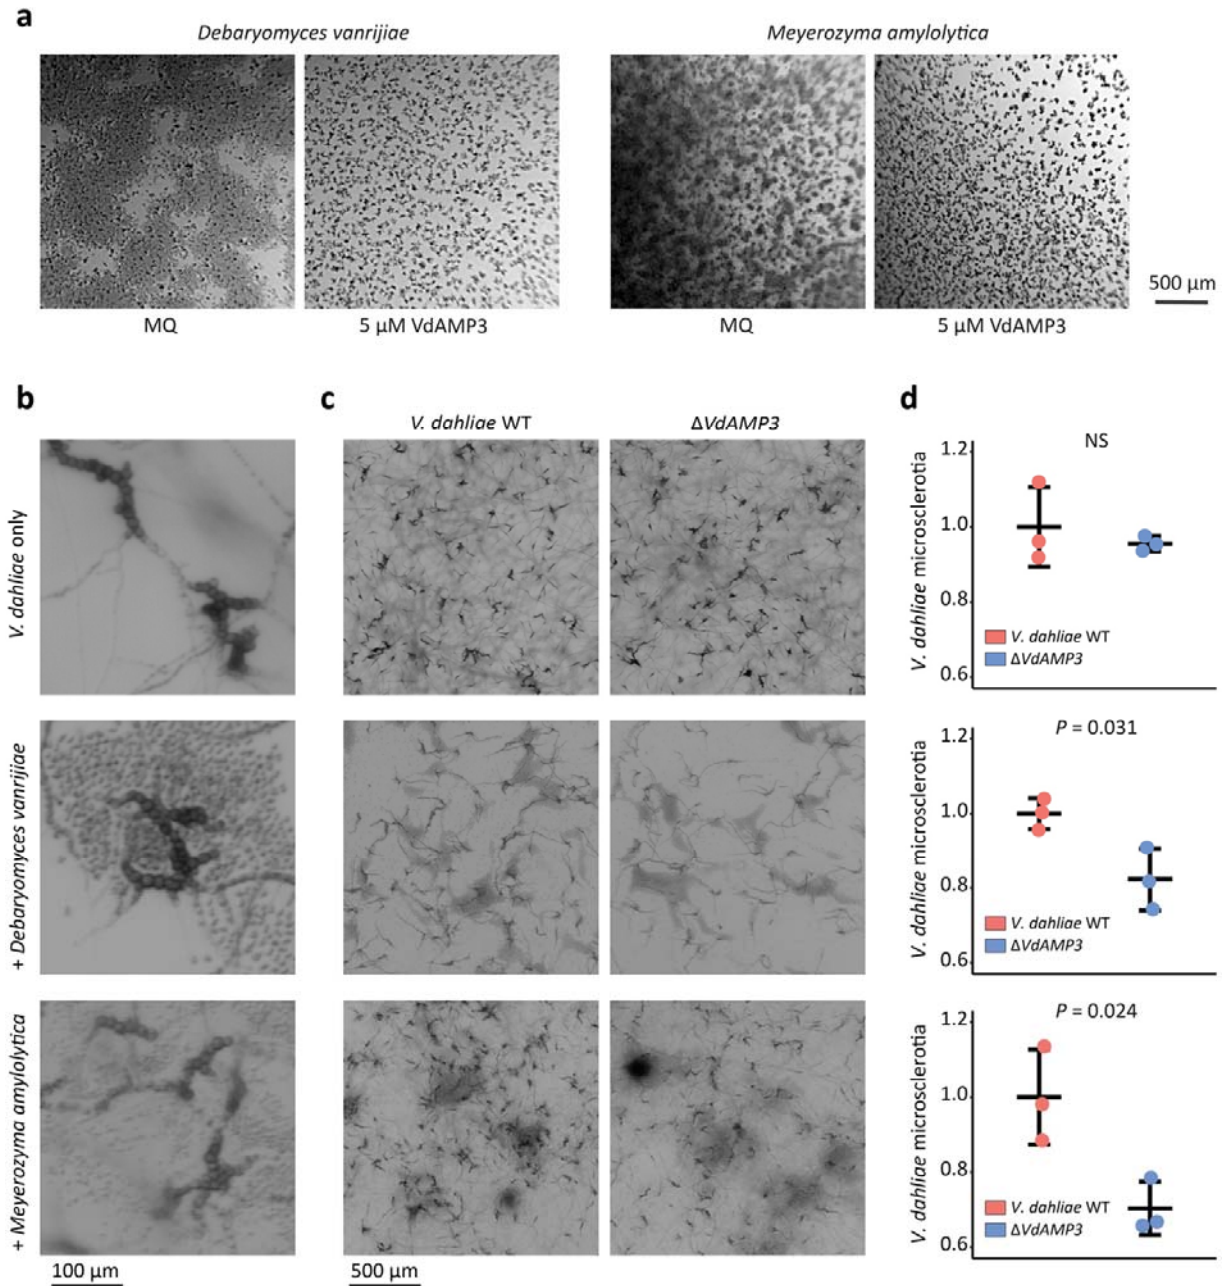

332  
 333

334 **Figure 5. VdAMP3 contributes to *V. dahliae* microsclerotia formation in the presence of fungal**  
335 **niche competitors. (a)** *Debaryomyces vanrijae* and *Meyerozyma amylolytica* are inhibited by  
336 VdAMP3. Microscopic pictures of the fungal species grown in 0.05x potato dextrose broth  
337 supplemented with 5  $\mu$ M VdAMP3 or ultrapure water (MQ). Pictures were taken after 10 (*D.*  
338 *vanrijae*) or 24 (*Meyerozyma amylolytica*) hours of cultivation. **(b)** Close-up of *V. dahliae*  
339 microsclerotia formed after seven days of cultivation in the presence of *D. vanrijae* or *M.*  
340 *amylolytica*. **(c)** VdAMP3 contributes to *V. dahliae* microsclerotia formation in the presence of the  
341 other fungal species. Representative microscopic pictures displaying the co-culture of *V. dahliae* with  
342 *D. vanrijae* or *M. amylolytica*. Pictures were taken after seven days of co-cultivation. **(d)** Relative  
343 number of microsclerotia formed by *V. dahliae* WT and the *VdAMP3* deletion mutant in the  
344 presence of *D. vanrijae* or *M. amylolytica* as determined using ImageJ (unpaired two-sided student's  
345 t-test; N=3).

346 **DISCUSSION**

347 Microbes secrete a plethora of molecules to promote niche colonization (4). Free-living microbes are  
348 well known producers of antimicrobials that are secreted to outcompete microbial co-inhabitants to  
349 establish themselves in a microbial community. Microbial plant pathogens secrete a diversity of so-  
350 called effector molecules during host ingress, many of which are small cysteine-rich proteins that  
351 deregulate host immune responses to promote colonization (4, 6, 7). While investigating the  
352 vascular wilt fungus *V. dahliae*, we recently demonstrated that plant pathogens not only exploit  
353 effector proteins to promote disease establishment through direct host manipulation, but also  
354 through the manipulation of plant microbiota by means of antibacterial activities (18). Considering  
355 that the advent of fungi on earth preceded land plant evolution, we speculated that a subset of the  
356 pathogen effectors involved in host microbiota manipulation may have evolved from antimicrobial  
357 proteins that originally functioned in microbial competition in terrestrial niches before the first land  
358 plants appeared and plant pathogenicity evolved. Here, we demonstrated that the soil-borne fungal  
359 plant pathogen *V. dahliae* has co-opted an ancient antimicrobial protein as effector for mycobiome  
360 manipulation *in planta* to safeguard the formation of its resting structures. Thus, our findings  
361 indicate that plant pathogenicity in fungi is not exclusively associated with the evolution of novel  
362 effectors that manipulate plants or their associated microbial communities, but also with the co-  
363 option of previously evolved secreted proteins that initially served alternative lifestyles, such as  
364 saprotrophism, as effectors to promote host colonization. Moreover, our findings indicate that  
365 effector-mediated manipulation of plant microbiota by microbial plant pathogens is not confined to  
366 bacterial targets, but extends to eukaryotic microbes.

367         Functional characterization of VdAMP3 unveiled that the effector evolved to play a life  
368 stage-specific role in microbiome-manipulation during microsclerotia formation by *V. dahliae*.  
369 Recently, we described the characterization of the first microbiome-manipulating effectors secreted  
370 by *V. dahliae*; VdAve1 and VdAMP2 (18). VdAve1 is a ubiquitously expressed bactericidal effector  
371 that promotes *V. dahliae* host colonization through the selective manipulation of host microbiota in

372 the roots as well as in the xylem by suppressing microbial antagonists. Moreover, VdAve1 is also  
373 expressed in the soil biome where it similarly contributes to niche colonization. Intriguingly, VdAMP2  
374 is exclusively expressed in soil, and like VdAve1 exerts an antibacterial activity that contributes to  
375 niche establishment. Interestingly, VdAMP2 and VdAve1 display divergent activity spectra, and  
376 therefore likely complement each other for optimal soil colonization. In decaying host tissue neither  
377 VdAve1 nor VdAMP2 is expressed, yet VdAMP3 expression occurs. Collectively, our findings for  
378 VdAve1, VdAMP2 and VdAMP3 demonstrate that *V. dahliae* dedicates a substantial part of its  
379 catalog of effector proteins towards microbiome manipulation, and that each of these effectors act  
380 in a life stage-specific manner.

381         The life stage-specific exploitation of the *in planta* secreted antimicrobial effectors VdAve1  
382 and VdAMP3 is well reflected by their antimicrobial activities and by the microbiota of the niches  
383 where they act. Contrary to previous *V. dahliae* transcriptome analyses, that repeatedly identified  
384 *VdAve1* as one of the most highly expressed effector genes *in planta* (17, 38–40), we detected a  
385 repression of the effector gene in decomposing *N. benthamiana* tissues (Fig. 1b,c). Characterization  
386 of the antimicrobial activity exerted by VdAve1 previously uncovered that the protein exclusively  
387 affects bacteria and does not impact fungi (18). Thanks to their ability to produce a wide diversity of  
388 hydrolytic enzymes, fungi are the primary decomposers of plant debris on earth (44). The  
389 phyllosphere of plants comprises a diversity of fungi (49–51). Importantly, upon plant senescence,  
390 these fungi are provided the first access to decaying material on which they can act opportunistically  
391 once host immune responses have faded. Accordingly, we detected an increased abundance of fungi  
392 in the phyllosphere of the decomposing *N. benthamiana* plants diseased by *V. dahliae* when  
393 compared with healthy plants (Fig. 4b). The observed repression of *VdAve1* and the subsequent  
394 induction of *VdAMP3* in a niche where *V. dahliae* encounters more fungal competition, underscores  
395 the notion that *V. dahliae* tailors the expression of its microbiome-manipulating effectors according  
396 to the various microbiota that it encounters during the different life stages. Along these lines it is  
397 tempting to speculate that during saprotrophism in soil *V. dahliae* exploits antimicrobial effector

398 proteins to ward off other eukaryotic competitors including soil-dwelling parasites such as  
399 fungivorous nematodes or protists. However, evidence for this hypothesis is presently lacking.

400       Antimicrobial resistance in bacteria and fungi is posing an increasing threat to human health.  
401 Possibly, microbiome-manipulating effectors represent a valuable source for the identification and  
402 development of novel antimicrobials that can be deployed to treat microbial infections. Arguably,  
403 our findings that microbiome-manipulating effectors secreted by plant pathogens also comprise  
404 antifungal proteins opens up opportunities for the identification and development of novel  
405 antimycotics. Most fungal pathogens of mammals are saprophytes that generally thrive in soil or  
406 decaying organic matter, but can opportunistically cause disease in immunocompromised patients  
407 (52–54). Azoles are an important class of antifungal agents that are used to treat fungal infections in  
408 humans. Unfortunately, agricultural practices involving massive spraying of azoles to control fungal  
409 plant pathogens, but also the extensive use of azoles in personal care products, ultraviolet  
410 stabilizers, and anti-corrosives in aircrafts, for instance, give rise to an enhanced evolution of azole  
411 resistance in opportunistic pathogens of mammals in the environment (52, 55). For instance, azole  
412 resistant *Aspergillus fumigatus* strains are ubiquitous in agricultural soils and in decomposing crop  
413 waste material where they thrive as saprophytes (56, 57). Thus, fungal pathogens of mammals, like  
414 *A. fumigatus*, comprise niche competitors of fungal plant pathogens. Hence, we speculate that, like  
415 *V. dahliae*, also other plant pathogenic fungi may carry potent antifungal proteins in their effector  
416 catalogues that aid in niche competition with these fungi. Possibly, the identification of such  
417 effectors could contribute to the development of novel antimycotics.

## 418 MATERIALS AND METHODS

### 419 Gene expression analyses

420 *In vitro* cultivation of *V. dahliae* strain JR2 for analysis of *VdAMP3* and *Chr6g02430* expression was  
421 performed as described previously (24). Additionally, for *in planta* expression analyses, total RNA  
422 was isolated from individual leaves or complete *N. benthamiana* plants harvested at different time  
423 points after *V. dahliae* root dip inoculation. To induce microsclerotia formation, *N. benthamiana*  
424 plants were harvested at 22 dpi and incubated in sealed plastic bags (volume = 500 mL) for 8 days,  
425 prior to RNA isolation. RNA isolations were performed using the Maxwell<sup>®</sup> 16 LEV Plant RNA Kit  
426 (Promega, Madison, USA). Real-time PCR was performed as described previously using the primers  
427 listed in Supplementary Table 3 (17).

428

### 429 Generation of *V. dahliae* mutants

430 The *VdAMP3* deletion and complementation mutants, as well as the eGFP expression mutant, were  
431 generated as described previously using the primers listed in Supplementary Table 3 (18). To  
432 generate the *VdAMP3* complementation construct, the *VdAMP3* coding sequence was amplified  
433 with flanking sequences (~0.9 kb upstream and ~0.8 kb downstream) and cloned into pCG (58).  
434 Finally, the construct was used for *Agrobacterium tumefaciens*-mediated transformation of *V.*  
435 *dahliae* as described previously (59). *In vitro* growth and microsclerotia production of the *VdAMP3*  
436 deletion mutant was tested and quantified as described previously (18).

437

### 438 Microbial isolates

439 Bacterial strains *B. subtilis* AC95, *S. xylosus* M3, *P. corrugata* C26, *Streptomyces* sp. NE-P-8 and  
440 *Ralstonia* sp. M21 were obtained from our in-house endophyte culture collection. Bacterial strains  
441 *Novosphingobium* sp. (NCCB 100261) and *Sphingobacterium canadese* (NCCB100125) were obtained  
442 from the Westerdijk Fungal Biodiversity Institute (Utrecht, the Netherlands). Fungal strains  
443 *Saccharomyces cerevisiae* H15 and *Trichoderma viride* were obtained from our in-house culture

444 collection. Fungal strains *Cyberlindnera jadinii* (DSM 70167), *Cordyceps militaris* (DSM 1153),  
445 *Debaryomyces vanriijiae* (DSM 70252), *Meyerozyma amylolytica* (DSM 27310) and *Rhodotorula*  
446 *bogoriensis* (DSM 70872) were obtained from the Leibniz Institute DSMZ.

447

#### 448 ***In vitro* microbial growth assays**

449 Bacterial isolates were grown on lysogeny broth agar (LBA) at 28°C. Single colonies were selected  
450 and grown overnight in low salt LB (10 g/L tryptone, 5 g/L yeast extract and 0.5 g/L sodium chloride)  
451 at 28°C while shaking at 200 rpm. Overnight cultures were resuspended to OD<sub>600</sub>=0.025 in fresh low  
452 salt LB supplemented with 20 µM VdAMP3 or ultrapure water (MQ). *In vitro* growth was quantified  
453 using a CLARIOstar plate reader (BMG Labtech) as described previously (18).

454 Fungal isolates were grown on potato dextrose agar (PDA) at 22°C. For yeasts, single  
455 colonies were selected and grown overnight in 0.05x potato dextrose broth (PDB) at 28°C while  
456 shaking at 200 rpm. Overnight cultures were resuspended to OD<sub>600</sub>=0.01 in fresh 0.05x potato  
457 dextrose broth supplemented with 5 µM VdAMP3 or ultrapure water (MQ). Alternatively, for  
458 filamentous fungi, spores were harvested from PDA and suspended in 0.05x potato dextrose broth  
459 supplemented with 5 µM VdAMP3 or ultrapure water (MQ) to a final concentration of 10<sup>4</sup>  
460 spores/mL. Next, 200 µL of the fungal suspensions was aliquoted in clear 96-well flat-bottom  
461 polystyrene tissue culture plates. Plates were incubated at 28°C and fungal growth was imaged using  
462 a SZX10 stereo microscope (Olympus) with EP50 camera (Olympus).

463

#### 464 **Inoculation assays**

465 Three-week-old *N. benthamiana* seedlings grown in the greenhouse at 21°C/19°C during 16h/8h  
466 day/night periods, respectively, with 70% relative humidity, were inoculated with *V. dahliae* through  
467 root-dip inoculation as described previously (60). After 14 days, above-ground parts of the *N.*  
468 *benthamiana* plants were harvested and stored at -20°C. Alternatively, above-ground parts were  
469 collected and transferred to plastic bags (volume = 500 mL) and incubated for four weeks at room

470 temperature. Next, all *N. benthamiana* samples were ground using mortar and pestle. Subsequent  
471 genomic DNA isolation and *V. dahliae* biomass quantification was performed as previously described  
472 using the primers listed in Supplementary Table 3 (61).

473

#### 474 **Fluorescence microscopy**

475 Conidiospores of the *pVdAMP3::eGFP* reporter strain were harvested from a PDA plate and diluted  
476 to a final concentration of  $10^5$  conidiospores/mL in 0.1x Czapek Dox medium. The suspension was  
477 incubated for one week at room temperature to allow hyphae to grow and microsclerotia to form.  
478 Finally, eGFP accumulating in the fungal cells was detected using a Nikon ECLIPSE 90i microscope.

479

#### 480 **Microbiome analysis**

481 Inoculation and incubation of *N. benthamiana* plants was performed as described above. After four  
482 weeks of incubation in plastic bags at room temperature in the dark, the decaying *N. benthamiana*  
483 phyllosphere samples colonized by *V. dahliae* WT and the *VdAMP3* deletion mutant were collected.  
484 The phyllospheres of fresh three-week-old *N. benthamiana* plants were included as controls. All  
485 samples were flash-frozen in liquid nitrogen and ground using mortar and pestle, genomic DNA was  
486 isolated using the DNeasy PowerSoil Kit (Qiagen, Venlo, The Netherlands). Sequencing libraries were  
487 prepared using the TruSeq DNA Nano kit (Illumina, San Diego, CA) and paired-end 150 bp sequencing  
488 was performed on the Illumina NextSeq500 platform at the Utrecht Sequencing Facility (USEQ).

489 The sequencing data was processed as follows. Quality control of the reads, adapter  
490 trimming and removal of *N. benthamiana* reads was performed with the ATLAS metagenomic  
491 workflow using the default parameters of the configuration file (62). Reads of the different samples  
492 were combined and assembled using metaSPAdes (used k-mer sizes: 21, 33, 55) to obtain a single  
493 metagenome cross-assembly (63). Subsequently, the cross-assembled contigs were taxonomically  
494 classified using CAT and binned per genus (64). The reads of the individual samples were mapped to  
495 the binned contigs using BWA-MEM (65). Next, the mapping files were converted to bam-format



496 using SAMtools (66) v1.10 and the number of reads mapped to the contigs of a single genus were  
497 converted to “reads per million” for the individual samples. The generated taxonomy table and  
498 abundance table were subsequently transformed into a phyloseq (67) object (v.1.30.0) in R (v.3.6.1)  
499 to facilitate analysis of the microbiomes. The alpha diversity (Shannon index) and beta diversity  
500 (Bray–Curtis dissimilarity) were determined as described previously (67, 68). The DESeq2 extension  
501 of phyloseq was used to identify differentially abundant microbial genera (69). To this end, a  
502 parametric model was applied to the data and a negative binomial Wald test was used to test for  
503 significant differential abundance.

504

#### 505 **Fungal co-cultivation assays**

506 Fungal isolates were grown on PDA at room temperature. For *D. vanriijiae* and *M. amylolytica* single  
507 colonies were selected and grown overnight in 0.05x PDB at 28°C while shaking at 200 rpm. The  
508 overnight cultures of *D. vanriijiae* and *M. amylolytica* were resuspended to OD<sub>600</sub>=0.001 and 0.0001  
509 in fresh 0.05x PDB, respectively. Conidiospores of *V. dahliae* strain JR2 and the *VdAMP3* deletion  
510 mutant were harvested from PDA plates and diluted in ultrapure water (MQ) to a final concentration  
511 of 10<sup>4</sup> conidiospores/mL. Next, 150 µL of the yeast suspensions were mixed with 150 µL of the *V.*  
512 *dahliae* conidiospore suspensions in clear 24-well flat-bottom polystyrene tissue culture plates.  
513 Finally, after seven days of incubation at 22°C, fungal growth was imaged using a SZX10 stereo  
514 microscope (Olympus) with EP50 camera (Olympus). The number of microsclerotia formed by *V.*  
515 *dahliae* WT and the *VdAMP3* deletion mutant was quantified using ImageJ.

516 **Acknowledgements**

517 B.P.H.J.T. is supported by the Research Council Earth and Life Sciences (ALW) of the Netherlands  
518 Organization of Scientific Research (NWO). B.P.H.J.T acknowledges funding by the Alexander von  
519 Humboldt Foundation in the framework of an Alexander von Humboldt Professorship endowed by  
520 the German Federal Ministry of Education and research is furthermore supported by the Deutsche  
521 Forschungsgemeinschaft (DFG, German Research Foundation) under Germany's Excellence Strategy  
522 – EXC 2048/1 – Project ID: 390686111. We thank Utrecht Sequencing Facility, subsidized by the  
523 University Medical Center Utrecht, Hubrecht Institute, Utrecht University, and The Netherlands X-  
524 omics Initiative (NWO project 184.034.019), for providing sequencing service. The authors declare  
525 no competing interests exist.

526

527 **Author contributions**

528 N.C.S. and B.P.H.J.T. conceived the project. N.C.S., G.C.P. and B.P.H.J.T. designed the experiments.  
529 N.C.S., G.C.P. and G.C.M.B. carried out the experiments. N.C.S., G.C.P., M.F.S. and B.P.H.J.T. analyzed  
530 the data. N.C.S. and B.P.H.J.T. wrote the manuscript. All authors read and approved the final  
531 manuscript.

532

533 **Data and materials availability**

534 The metagenomics data have been deposited in the NCBI GenBank database under BioProject  
535 PRJNA728211.

536

537 **REFERENCES**

- 538 1. F. Demoling, D. Figueroa, E. Bååth, Comparison of factors limiting bacterial growth in  
539 different soils. *Soil Biol. Biochem.* **39**, 2485–2495 (2007).
- 540 2. L. Katz, R. H. Baltz, Natural product discovery: past, present, and future. *J. Ind. Microbiol.*  
541 *Biotechnol.* **43**, 155–176 (2016).
- 542 3. A. Van der Meij, S. F. Worsley, M. I. Hutchings, G. P. van Wezel, Chemical ecology of antibiotic  
543 production by actinomycetes. *FEMS Microbiol. Rev.* **41**, 392–416 (2017).
- 544 4. H. Rovenich, J. C. Boshoven, B. P. H. J. Thomma, Filamentous pathogen effector functions: of  
545 pathogens, hosts and microbiomes. *Curr. Opin. Plant Biol.* **20**, 96–103 (2014).
- 546 5. N. C. Snelders, G. J. Kettles, J. J. Rudd, B. P. H. J. Thomma, Plant pathogen effector proteins as  
547 manipulators of host microbiomes? *Mol. Plant Pathol.* **19**, 257 (2018).
- 548 6. M. C. Giraldo, B. Valent, Filamentous plant pathogen effectors in action. *Nat. Rev. Microbiol.*  
549 **11**, 800–814 (2013).
- 550 7. L. Lo Presti, *et al.*, Fungal effectors and plant susceptibility. *Annu. Rev. Plant Biol.* **66**, 513–545  
551 (2015).
- 552 8. R. L. Berendsen, C. M. J. Pieterse, P. A. H. M. Bakker, The rhizosphere microbiome and plant  
553 health. *Trends Plant Sci.* **17**, 478–486 (2012).
- 554 9. C. Dimkpa, T. Weinand, F. Asch, Plant–rhizobacteria interactions alleviate abiotic stress  
555 conditions. *Plant. Cell Environ.* **32**, 1682–1694 (2009).
- 556 10. G. Castrillo, *et al.*, Root microbiota drive direct integration of phosphate stress and immunity.  
557 *Nature* **543**, 513–518 (2017).
- 558 11. C. R. Fitzpatrick, *et al.*, Assembly and ecological function of the root microbiome across  
559 angiosperm plant species. *Proc. Natl. Acad. Sci.* **115**, E1157–E1165 (2018).
- 560 12. Y. Bai, *et al.*, Functional overlap of the *Arabidopsis* leaf and root microbiota. *Nature* **528**, 364–  
561 369 (2015).
- 562 13. P. Durán, *et al.*, Microbial interkingdom interactions in roots promote *Arabidopsis* survival.  
563 *Cell* **175**, 973–983 (2018).
- 564 14. N. Lombardi, *et al.*, Root exudates of stressed plants stimulate and attract *Trichoderma* soil  
565 fungi. *Mol. Plant-Microbe Interact.* **31**, 982–994 (2018).
- 566 15. R. L. Berendsen, *et al.*, Disease-induced assemblage of a plant-beneficial bacterial  
567 consortium. *ISME J.* **12**, 1496–1507 (2018).
- 568 16. V. J. Carrión, *et al.*, Pathogen-induced activation of disease-suppressive functions in the  
569 endophytic root microbiome. *Science*. **366**, 606–612 (2019).
- 570 17. R. de Jonge, *et al.*, Tomato immune receptor Ve1 recognizes effector of multiple fungal  
571 pathogens uncovered by genome and RNA sequencing. *Proc. Natl. Acad. Sci.* **109**, 5110–5115  
572 (2012).
- 573 18. N. C. Snelders, *et al.*, Microbiome manipulation by a soil-borne fungal plant pathogen using  
574 effector proteins. *Nat. Plants* **6**, 1365–1374 (2020).
- 575 19. P. Inderbitzin, *et al.*, Phylogenetics and taxonomy of the fungal vascular wilt pathogen  
576 *Verticillium*, with the descriptions of five new species. *PLoS One* **6** (2011).
- 577 20. S. J. Klosterman, *et al.*, Comparative genomics yields insights into niche adaptation of plant  
578 vascular wilt pathogens. *PLoS Pathog.* **7** (2011).
- 579 21. L. Mol, H. W. Van Riessen, Effect of plant roots on the germination of microsclerotia of  
580 *Verticillium dahliae*. *Eur. J. plant Pathol.* **101**, 673–678 (1995).
- 581 22. S. J. Klosterman, Z. K. Atallah, G. E. Vallad, K. V. Subbarao, Diversity, pathogenicity, and  
582 management of *Verticillium* species. *Annu. Rev. Phytopathol.* **47**, 39–62 (2009).
- 583 23. W. C. Schnathorst, Life cycle and epidemiology of *Verticillium*. *Fungal wilt Dis. plants* **82**  
584 (1981).
- 585 24. D. Xiong, *et al.*, Deep mRNA sequencing reveals stage-specific transcriptome alterations  
586 during microsclerotia development in the smoke tree vascular wilt pathogen, *Verticillium*  
587 *dahliae*. *BMC Genomics* **15**, 324 (2014).

- 588 25. R. de Oliveira Dias, O. L. Franco, Cysteine-stabilized  $\alpha\beta$  defensins: from a common fold to  
589 antibacterial activity. *Peptides* **72**, 64–72 (2015).
- 590 26. L. A. Kelley, S. Mezulis, C. M. Yates, M. N. Wass, M. J. E. Sternberg, The Phyre2 web portal for  
591 protein modeling, prediction and analysis. *Nat. Protoc.* **10**, 845 (2015).
- 592 27. T. M. A. Shafee, F. T. Lay, M. D. Hulett, M. A. Anderson, The defensins consist of two  
593 independent, convergent protein superfamilies. *Mol. Biol. Evol.* **33**, 2345–2356 (2016).
- 594 28. M. Dal Peraro, F. G. Van Der Goot, Pore-forming toxins: ancient, but never really out of  
595 fashion. *Nat. Rev. Microbiol.* **14**, 77–92 (2016).
- 596 29. P. H. Mygind, *et al.*, Plectasin is a peptide antibiotic with therapeutic potential from a  
597 saprophytic fungus. *Nature* **437**, 975–980 (2005).
- 598 30. T. Schneider, *et al.*, Plectasin, a fungal defensin, targets the bacterial cell wall precursor Lipid  
599 II. *Science*. **328**, 1168–1172 (2010).
- 600 31. J. S. Oeemig, *et al.*, Eurocin, a new fungal defensin: structure, lipid binding, and its mode of  
601 action. *J. Biol. Chem.* **287**, 42361–42372 (2012).
- 602 32. I. V. Grigoriev, *et al.*, MycoCosm portal: gearing up for 1000 fungal genomes. *Nucleic Acids*  
603 *Res.* **42**, D699–D704 (2014).
- 604 33. J. W. Spatafora, *et al.*, A phylum-level phylogenetic classification of zygomycete fungi based  
605 on genome-scale data. *Mycologia* **108**, 1028–1046 (2016).
- 606 34. S. Kumar, G. Stecher, M. Suleski, S. B. Hedges, TimeTree: a resource for timelines, timetrees,  
607 and divergence times. *Mol. Biol. Evol.* **34**, 1812–1819 (2017).
- 608 35. D. S. Heckman, *et al.*, Molecular evidence for the early colonization of land by fungi and  
609 plants. *Science*. **293**, 1129–1133 (2001).
- 610 36. M. L. Berbee, J. W. Taylor, “Fungal molecular evolution: gene trees and geologic time” in  
611 *Systematics and Evolution*, (Springer, 2001), pp. 229–245.
- 612 37. J. L. Morris, *et al.*, The timescale of early land plant evolution. *Proc. Natl. Acad. Sci.* **115**,  
613 E2274–E2283 (2018).
- 614 38. L. Faino, R. de Jonge, B. P. H. J. Thomma, The transcriptome of *Verticillium dahliae* infected  
615 *Nicotiana benthamiana* determined by deep RNA sequencing. *Plant Signal. Behav.* **7**, 1065–  
616 1069 (2012).
- 617 39. J. Depotter, *et al.*, Homogenization of sub-genome secretome gene expression patterns in the  
618 allodiploid fungus *Verticillium longisporum*. *BioRxiv*, 341636 (2018).
- 619 40. H. Gibriel, J. Li, L. Zhu, M. F. Seidl, B. P. H. J. Thomma, *Verticillium dahliae* strains that infect  
620 the same host plant display highly divergent effector catalogs. *bioRxiv*, 528729 (2019).
- 621 41. D. Duressa, *et al.*, RNA-seq analyses of gene expression in the microsclerotia of *Verticillium*  
622 *dahliae*. *BMC Genomics* **14**, 607 (2013).
- 623 42. A. Klimes, K. F. Dobinson, A hydrophobin gene, *VDH1*, is involved in microsclerotial  
624 development and spore viability in the plant pathogen *Verticillium dahliae*. *Fungal Genet.*  
625 *Biol.* **43**, 283–294 (2006).
- 626 43. H. C. Smith, The morphology of *Verticillium albo-atrum*, *V. dahliae*, and *V. tricorpus*. *New*  
627 *Zeal. J. Agric. Res.* **8**, 450–478 (1965).
- 628 44. M. R. Mäkelä, N. Donofrio, R. P. de Vries, Plant biomass degradation by fungi. *Fungal Genet.*  
629 *Biol.* **72**, 2–9 (2014).
- 630 45. J. Voříšková, P. Baldrian, Fungal community on decomposing leaf litter undergoes rapid  
631 successional changes. *ISME J.* **7**, 477–486 (2013).
- 632 46. T. Korkama-Rajala, M. M. Müller, T. Pennanen, Decomposition and fungi of needle litter from  
633 slow-and fast-growing Norway spruce (*Picea abies*) clones. *Microb. Ecol.* **56**, 76 (2008).
- 634 47. T. Osono, Role of phyllosphere fungi of forest trees in the development of decomposer fungal  
635 communities and decomposition processes of leaf litter. *Can. J. Microbiol.* **52**, 701–716  
636 (2006).
- 637 48. T. Osono, Phyllosphere fungi on leaf litter of *Fagus crenata*: occurrence, colonization, and  
638 succession. *Can. J. Bot.* **80**, 460–469 (2002).

- 639 49. R. Sapkota, K. Knorr, L. N. Jørgensen, K. A. O’Hanlon, M. Nicolaisen, Host genotype is an  
640 important determinant of the cereal phyllosphere mycobiome. *New Phytol.* **207**, 1134–1144  
641 (2015).
- 642 50. T. Gomes, J. A. Pereira, J. Benhadi, T. Lino-Neto, P. Baptista, Endophytic and epiphytic  
643 phyllosphere fungal communities are shaped by different environmental factors in a  
644 Mediterranean ecosystem. *Microb. Ecol.* **76**, 668–679 (2018).
- 645 51. A. E. Arnold, Understanding the diversity of foliar endophytic fungi: progress, challenges, and  
646 frontiers. *Fungal Biol. Rev.* **21**, 51–66 (2007).
- 647 52. P. E. Verweij, E. Snelders, G. H. J. Kema, E. Mellado, W. J. G. Melchers, Azole resistance in  
648 *Aspergillus fumigatus*: a side-effect of environmental fungicide use? *Lancet Infect. Dis.* **9**,  
649 789–795 (2009).
- 650 53. R. C. May, N. R. H. Stone, D. L. Wiesner, T. Bicanic, K. Nielsen, *Cryptococcus*: from  
651 environmental saprophyte to global pathogen. *Nat. Rev. Microbiol.* **14**, 106–117 (2016).
- 652 54. E. Klein, M. Ofek, J. Katan, D. Minz, A. Gamliel, Soil suppressiveness to *Fusarium* disease:  
653 shifts in root microbiome associated with reduction of pathogen root colonization.  
654 *Phytopathology* **103**, 23–33 (2013).
- 655 55. J. B. Buil, *et al.*, The fading boundaries between patient and environmental routes of triazole  
656 resistance selection in *Aspergillus fumigatus*. *PLoS Pathog.* **15**, e1007858 (2019).
- 657 56. J. Zhang, *et al.*, Dynamics of *Aspergillus fumigatus* in azole fungicide-containing plant waste in  
658 the Netherlands (2016–2017). *Appl. Environ. Microbiol.* **87** (2021).
- 659 57. S. E. Schoustra, *et al.*, Environmental hotspots for azole resistance selection of *Aspergillus*  
660 *fumigatus*, the Netherlands. *Emerg. Infect. Dis.* **25**, 1347 (2019).
- 661 58. L. Zhou, J. Zhao, W. Guo, T. Zhang, Functional analysis of autophagy genes via *Agrobacterium*-  
662 mediated transformation in the vascular wilt fungus *Verticillium dahliae*. *J. Genet. genomics*  
663 **40**, 421–431 (2013).
- 664 59. P. Santhanam, “Random insertional mutagenesis in fungal genomes to identify virulence  
665 factors” in *Plant Fungal Pathogens*, B. P. H. J. Thomma, M. D. Bolton, Eds. (Springer, 2012),  
666 pp. 509–517.
- 667 60. E. F. Fradin, *et al.*, Genetic dissection of *Verticillium* wilt resistance mediated by tomato Ve1.  
668 *Plant Physiol.* **150**, 320–332 (2009).
- 669 61. Y. Song, *et al.*, Transfer of tomato immune receptor Ve1 confers Ave1-dependent *Verticillium*  
670 resistance in tobacco and cotton. *Plant Biotechnol. J.* **16**, 638–648 (2018).
- 671 62. S. Kieser, J. Brown, E. M. Zdobnov, M. Trajkovski, L. A. McCue, ATLAS: a Snakemake workflow  
672 for assembly, annotation, and genomic binning of metagenome sequence data. *BMC*  
673 *Bioinformatics* **21**, 1–8 (2020).
- 674 63. S. Nurk, D. Meleshko, A. Korobeynikov, P. A. Pevzner, metaSPAdes: a new versatile  
675 metagenomic assembler. *Genome Res.* **27**, 824–834 (2017).
- 676 64. F. A. B. von Meijenfheldt, K. Arkhipova, D. D. Cambuy, F. H. Coutinho, B. E. Dutilh, Robust  
677 taxonomic classification of uncharted microbial sequences and bins with CAT and BAT.  
678 *Genome Biol.* **20**, 1–14 (2019).
- 679 65. H. Li, Aligning sequence reads, clone sequences and assembly contigs with BWA-MEM. *arXiv*  
680 *Prepr. arXiv1303.3997* (2013).
- 681 66. H. Li, *et al.*, The sequence alignment/map format and SAMtools. *Bioinformatics* **25**, 2078–  
682 2079 (2009).
- 683 67. P. J. McMurdie, S. Holmes, phyloseq: an R package for reproducible interactive analysis and  
684 graphics of microbiome census data. *PLoS One* **8**, e61217 (2013).
- 685 68. B. J. Callahan, K. Sankaran, J. A. Fukuyama, P. J. McMurdie, S. P. Holmes, Bioconductor  
686 workflow for microbiome data analysis: from raw reads to community analyses.  
687 *F1000Research* **5** (2016).
- 688 69. M. I. Love, W. Huber, S. Anders, Moderated estimation of fold change and dispersion for  
689 RNA-seq data with DESeq2. *Genome Biol.* **15**, 550 (2014).
- 690

691 **FIGURE LEGENDS**

692 **Figure 1. The *V. dahliae* effector VdAMP3 evolved from an ancient fungal protein. (a)** VdAMP3  
693 (left) is predicted to adopt a cysteine-stabilized  $\alpha\beta$  (CS $\alpha\beta$ ) defensin-like fold. The structure of the  
694 CS $\alpha\beta$  defensin Plectasin (right) of the fungus *Pseudoplectania nigrella* is included as reference. The  
695 disulfide bonds stabilizing the antiparallel  $\beta$ -sheets and the  $\alpha$ -helix are highlighted in yellow.  
696 Positively and negatively charged amino acid residues are highlighted in blue and red, respectively.  
697 **(b)** Protein sequence alignment with CS $\alpha\beta$  defensins Plectasin and Eurocin (*Eurotium amstelodami*)  
698 supports the structure prediction of VdAMP3. **(c)** VdAMP3 homologs are widespread in the fungal  
699 kingdom. Protein sequence alignment of VdAMP3 with a subset of its homologs identified in higher  
700 (Ascomycota and Basidiomycota) and lower fungi (Mucoromycotina and Zoopagomycota). The  
701 alignment as shown in **(b-c)** displays the most conserved region of the CS $\alpha\beta$  defensin protein family  
702 and was performed using HMMER and visualized with Esript3. The highly conserved cysteine and  
703 glycine residues that contribute to the CS $\alpha\beta$  defensin structure are highlighted by yellow and red  
704 backgrounds, respectively. The homologs displayed in **(c)** were identified using blastP in the  
705 predicted proteomes of the respective fungi included in the JGI 1000 Fungal Genomes Project (32).

706

707 **Figure 2. VdAMP3 is specifically expressed in hyphal cells that develop into microsclerotia. (a)**  
708 Expression of *VdAMP3* and the marker gene for microsclerotia development *Chr6g02430*, relative to  
709 the household gene *VdGAPDH* at 48 and 96 hours of *in vitro* cultivation (N=3). **(b)** Expression of  
710 *VdAve1*, *VdAMP3* and *Chr6g02430* in *N. benthamiana* leaves from 7 to 22 days post inoculation (dpi)  
711 (N=5). **(c)** Expression of *VdAve1*, *VdAMP3* and *Chr6g02430* in tissue of *N. benthamiana* plants  
712 harvested at 22 days post inoculation after 8 days of incubation in sealed plastic bags (N=3). **(d)**  
713 Microsclerotia formation of a *pVdAMP3::eGFP* reporter mutant as detected after 7 days of  
714 cultivation in Czapek Dox medium. Typical chains of microsclerotia (42, 43) are indicated by arrows.  
715 **(e)** Bright field image of various *V. dahliae* cell types after 7 days of cultivation in Czapek Dox,  
716 including hyphae (\*), swollen hyphal cells developing into microsclerotia (‡) and mature

717 microsclerotia cells (#). **(f)** GFP signal for the image as shown in **(e)**, indicative for activity of the  
718 *VdAMP3* promoter, is exclusively detected in the swollen hyphal cells developing into microsclerotia.  
719 **(g)** Overlay of **(e)** and **(f)**.

720

721 **Figure 3. VdAMP3 is an antifungal protein that contributes to *V. dahliae* biomass accumulation in**  
722 **the decaying host phyllosphere. (a)** Microscopic pictures of fungal isolates grown in 0.05x potato  
723 dextrose broth supplemented with 5  $\mu$ M *VdAMP3* or ultrapure water (MQ). *VdAMP3* impairs growth  
724 of *Alternaria brassicicola*, *Cladosporium cucumerinum*, *Pichia pastoris* and *Saccharomyces cerevisiae*.  
725 Pictures were taken after 24 (*A. brassicicola*, *C. cucumerinum* and *S. cerevisiae*) or 64 (*P. pastoris*)  
726 hours of incubation. **(b)** *VdAMP3* does not contribute to establishment of Verticillium wilt disease in  
727 *N. benthamiana*. Photos display representative phenotypes of *N. benthamiana* plants infected by  
728 wild-type *V. dahliae* (WT), the *VdAMP3* deletion ( $\Delta$ *VdAMP3*) and two complementation (Comp)  
729 mutants 14 days post inoculation. **(c)** Relative *V. dahliae* biomass in above-ground *N. benthamiana*  
730 tissues determined with real-time PCR. Different letter labels represent significant differences (one-  
731 way ANOVA and Tukey's post-hoc test;  $p < 0.05$ ;  $N \geq 27$ ) **(d)** Representative phenotypes of *N.*  
732 *benthamiana* plants as shown in **(b)** after 28 days of incubation in plastic bags. **(e)** Relative *V. dahliae*  
733 biomass in *N. benthamiana* tissues as displayed in **(d)**. Letters represent significant differences (one-  
734 way ANOVA and Tukey's post-hoc test;  $p < 0.05$ ;  $N \geq 27$ ).

735

736 **Figure 4. VdAMP3 manipulates the mycobiome of the decaying *N. benthamiana* phyllosphere. (a-**  
737 **b)** *V. dahliae*-induced decay of the *N. benthamiana* phyllosphere is associated with a decreased  
738 bacterial, and increased fungal, abundance. Relative abundance of bacteria **(a)** and fungi **(b)**,  
739 excluding *V. dahliae*, in the phyllosphere of decaying *N. benthamiana* plants colonized by wild-type  
740 *V. dahliae* or the *VdAMP3* deletion mutant (14 days post inoculation and after 28 days of incubation  
741 in plastic bags), and in the phyllosphere of fresh *N. benthamiana* plants (mock). Letters represent  
742 significant differences in total bacterial/fungal abundance between the three treatments (one-way

743 ANOVA and Tukey's post hoc test;  $P \leq 0.05$ ;  $N=3$ ). **(c)** *V. dahliae*-induced decay of *N. benthamiana*  
744 plants impacts alpha diversity of the phyllosphere. The plot displays the average Shannon index  $\pm$   
745 SD, letters represent significant differences (one-way ANOVA and Tukey's post hoc test;  $P \leq 0.05$ ;  
746  $N=3$ ). **(d)** Principal coordinate analysis based on Bray-Curtis dissimilarities (beta diversity) reveals  
747 separation of the microbiomes based on the three different treatments. **(e)** Differential abundance  
748 analysis of microbial genera between the microbiomes colonized by *V. dahliae* WT and the *VdAMP3*  
749 deletion mutant indicates that secretion of VdAMP3 significantly impacts a larger proportion of the  
750 fungi than of the bacteria (two-tailed Fisher's exact test). **(f)** Of the differentially abundant microbial  
751 genera, significantly more fungi display a decreased abundance in the presence of VdAMP3 when  
752 compared with the bacteria (two-tailed Fisher's exact test). **(g-h)** Overview of the differentially  
753 abundant bacterial **(g)** and fungal **(h)** genera. The plots display increased (positive  $\log_2$  fold change)  
754 or decreased (negative  $\log_2$  fold change) abundance in the presence of *V. dahliae* WT when  
755 compared with the *VdAMP3* deletion mutant (Wald test,  $P$  adjusted  $< 0.05$  and  $P < 0.05$ ,  $N=3$ ).  
756 Differentially abundant fungal genera from the Saccharomycetes or Sordariomycetes are  
757 consistently suppressed in the presence of VdAMP3.

758

759 **Figure 5. VdAMP3 contributes to *V. dahliae* microsclerotia formation in the presence of fungal**  
760 **niche competitors. (a)** *Debaryomyces vanrijae* and *Meyerozyma amylolytica* are inhibited by  
761 VdAMP3. Microscopic pictures of the fungal species grown in 0.05x potato dextrose broth  
762 supplemented with 5  $\mu$ M VdAMP3 or ultrapure water (MQ). Pictures were taken after 10 (*D.*  
763 *vanrijae*) or 24 (*Meyerozyma amylolytica*) hours of cultivation. **(b)** Close-up of *V. dahliae*  
764 microsclerotia formed after seven days of cultivation in the presence of *D. vanrijae* or *M.*  
765 *amylolytica*. **(c)** VdAMP3 contributes to *V. dahliae* microsclerotia formation in the presence of the  
766 other fungal species. Representative microscopic pictures displaying the co-culture of *V. dahliae* with  
767 *D. vanrijae* or *M. amylolytica*. Pictures were taken after seven days of co-cultivation. **(d)** Relative  
768 number of microsclerotia formed by *V. dahliae* WT and the *VdAMP3* deletion mutant in the



769 presence of *D. vanrijae* or *M. amylolytica* as determined using ImageJ (unpaired two-sided student's  
770 t-test; N=3).
